# Supplementary material
Source: HighWire-hosted journal article supplement (http://jpet.aspetjournals.org/highwire/filestream/143809/field_highwire_adjunct_files/0/250985Supplemental_Figure.pdf)

TITLE

Endothelial cell targeted deletion of PPAR $\gamma$  blocks rosiglitazone-induced plasma volume expansion and vascular remodeling in adipose tissue

AUTHORS

Taro E. Akiyama, Graham E. Skelhorne-Gross, Elizabeth D. Lightbody, Rachel E. Rubino, Jia Yue Shi, Lesley A. McNamara, Neelam Sharma, Emanuel I. Zycband, Frank J. Gonzalez, Haiying Liu, John W. Woods, C. H. Chang, Joel P. Berger and Christopher J.B. Nicol.

JOURNAL

Journal of Pharmacology and Experimental Therapeutics

SUPPLEMENTAL FILE

Supplemental Figure and Legend

SUPPLEMENTAL FIGURE LEGEND

**Suppl. Fig. 1. Body and select tissues weights from *Pparg*<sup>f/f</sup> and *Pparg*<sup>ΔEC</sup> mice.** Weights of mice and select tissues from each treatment group as described in Methods section were determined at necropsy. Top panel, body weights are expressed in grams. Middle panel, eWAT and lower panel, Liver weights are expressed as percentage of body weight. Data represent mean+SD.

Supplemental Fig 1

**BW**

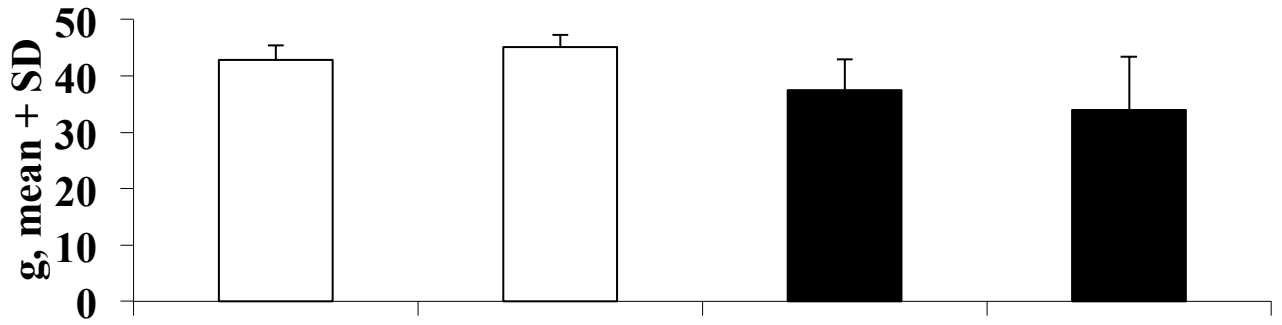

**WATEpi**

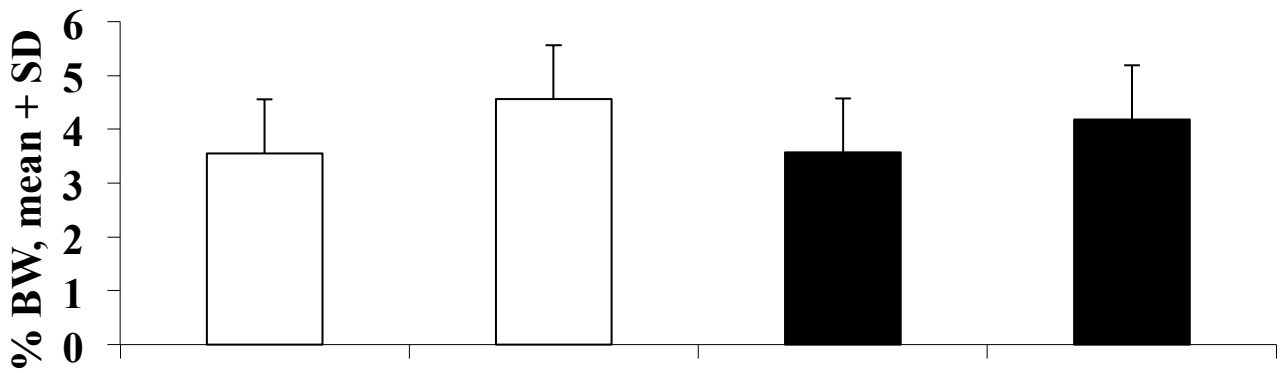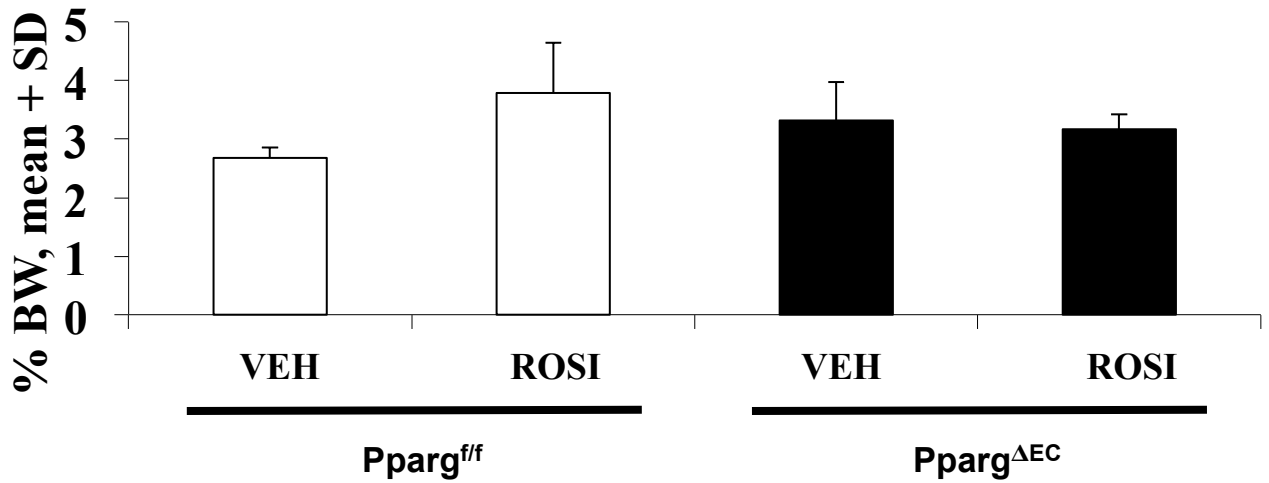

Supplement: 250985Supplemental_Figure.pdf [file 250985Supplemental_Figure.pdf]
